Correction

## Correction: LncRNA CHRF-induced miR-489 loss promotes metastasis of colorectal cancer via TWIST1/EMT signaling pathway

Youmao Tao<sup>1</sup>, Tao Han<sup>1</sup>, Tao Zhang<sup>1</sup>, Chong Ma<sup>1</sup> and Caixia Sun<sup>1</sup>

<sup>1</sup>Department of Gastrointestinal Colorectal and Anal Surgery, China-Japan Union Hospital of Jilin University, Changchun 130033, China

**Published:**

**Copyright:** © 2021 Tao et al. This is an open access article distributed under the terms of the [Creative Commons Attribution License](#) (CC BY 3.0), which permits unrestricted use, distribution, and reproduction in any medium, provided the original author and source are credited.

**This article has been corrected:** In Figure 7C, the 3rd panel image contains an accidental partial overlap of the 2nd panel image. The corrected Figure 7, produced using the original data, is shown below. The authors declare that these corrections do not change the results or conclusions of this paper.

Original article: Oncotarget. 2017; 8:36410–36422. <https://doi.org/10.18632/oncotarget.16850>

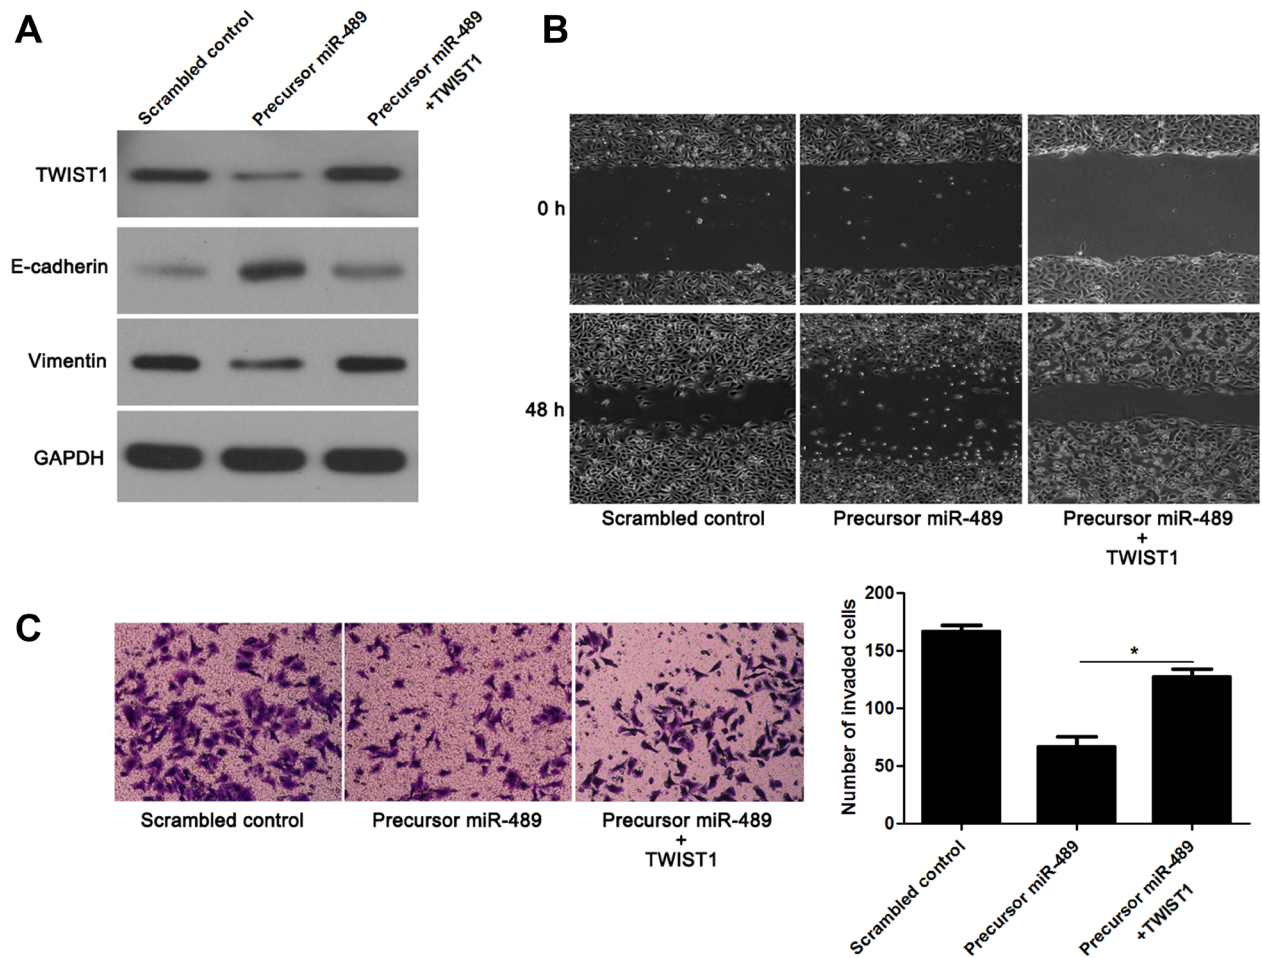

**Figure 7: TWIST1 restoration abolishes the effects of miR-489 in CRC cells.** (A) miR-489 overexpressing HCT116 cells were transfected with TWIST1 expression vector. TWIST1 overexpression abrogated the inhibitory effects of miR-489 on EMT process. (B) TWIST1 re-expression promoted migration of miR-489 overexpressing HCT116 cells. (C) TWIST1 restoration facilitated invasion of miR-489 overexpressing HCT116 cells.  $n =$  three independent experiments with similar results,  $*P < 0.05$  by ANOVA.
